# Supplementary material
Source: PubMed Central journal article supplement (PMC4538546)
Supplement: AAC.04831-14_zac010154378so1.pdf [file AAC.04831-14_zac010154378so1.pdf]

Table S1 Primers used in this study

| Primers name | Primer sequences           | Primer uses            |
|--------------|----------------------------|------------------------|
| 1(forward)   | GATTGAATCAGAACCTATTACGCT   | Closing gap            |
| 1(reverse)   | CCAATAATCGTAGCCATTGTATAG   | Closing gap            |
| 2(forward)   | CAGACGATGAGGCATTAGATGAAG   | Closing gap            |
| 2(reverse)   | GTACGGTTGTAATGGCTTTGAGGC   | Closing gap            |
| 3(forward)   | GGCCTCAAAGCCATTACAACCGTA   | Closing gap            |
| 3(reverse)   | CATTCGCTCACTTTTGTACTAA     | Closing gap            |
| 4(forward)   | CATGCATCCCCTTAATTCGAAAGC   | Closing gap            |
| 4(reverse)   | CTCTTCTGGTTGGAATGTGTGGTT   | Closing gap            |
| 5(forward)   | CGTCAGCACTTACAAAATCGGTTG   | Closing gap            |
| 5(reverse)   | GGAGTTAATCTACGTCTCATCTCA   | Closing gap            |
| 6(forward)   | CAGTTCATTGCTCACGATATGTGT   | Closing gap            |
| 6(reverse)   | CTCTTTGTCTCACTTTTGACCAAG   | Closing gap            |
| 7(forward)   | CTTGGTCAAAGTGAGACAAAGAG    | Closing gap            |
| 7(reverse)   | CATTACACTCTTGAGTCTCTCCCA   | Closing gap            |
| 8(forward)   | GACCAATACGTGGAAGTACACCAT   | Closing gap            |
| 8(reverse)   | GTAGCCAGTTAATTTCTACTAACCT  | Closing gap            |
| 9(forward)   | CATCACATGCAAAGCATTAGAGC    | Closing gap            |
| 9(reverse)   | CCATCCTAAATCGACCCAATACTT   | Closing gap            |
| 10(forward)  | GTATTGGGTCGATTTAGGATGGAA   | Closing gap            |
| 10(reverse)  | GATTTCCCGTACAATATGAGCTTC   | Closing gap            |
| 11(forward)  | GGACTTAAAGCAATCACGACAATT   | Closing gap            |
| 11(reverse)  | GCTTAGCGTCATTATAATGACCTC   | Closing gap            |
| 12(forward)  | CACACATGAACAAGAACAACCCGC   | Closing gap            |
| 12(reverse)  | GTGGTTCTGTTGCAAAGTTGAATT   | Closing gap            |
| 13(forward)  | CTTGTAGCCATGGCTATCCTTATT   | Closing gap            |
| 13(reverse)  | CAATGTGTTTAATCGCGTCTGTTC   | Closing gap            |
| 14(forward)  | CGCCAGTCGATTTAACGGACTTAA   | Closing gap            |
| 14(reverse)  | GGACAAATTCCAAGTTGCCCACTC   | Closing gap            |
| 15(forward)  | GCAGCTATTGTGGCGTAGAATTTA   | Closing gap            |
| 15(reverse)  | CACCCTCATTAGTCGATGTCATAT   | Closing gap            |
| 16(forward)  | GGATGACAGGAAATGAACTGAAAG   | Closing gap            |
| 16(reverse)  | GAATGCTGGCCACTCTCTACCAT    | Closing gap            |
| 17(forward)  | GCAACAAATAAGCTGCGTACCTTA   | Closing gap            |
| 17(reverse)  | CTTA ACTCTAACTCTGAGTAAGCT  | Closing gap            |
| 18(forward)  | GCAATTGGTGCAGGCACAGATGTT   | Closing gap            |
| 18(reverse)  | GACTCTGCAACTTCAGGAAATATT   | Closing gap            |
| 19(forward)  | CACTGTCATATACTTGAGCATGAAG  | Closing gap            |
| 19(reverse)  | CTTTGAGCGTCTCAATATCATTGG   | Closing gap            |
| 20(forward)  | GTCTCACGCTTACTATCTTCAACA   | Closing gap            |
| 20(reverse)  | GTTCTTTTTACATCTTCTGACACC   | Closing gap            |
| 21(forward)  | GCCAAGCCTCTAACATTAGAAGAA   | Closing gap            |
| 21(reverse)  | AAGGGACACCTATCGCCTTACATA   | Closing gap            |
| 1R           | CATACCTTACAACCTTTTACCGTCGA | Detecting SCC excision |
| 1F           | GCTGGTATTTTAGCATTATATCGG   | Detecting SCC excision |
| 2R           | TGTGCCAATTTTCGCTTCATTC     | Detecting SCC excision |
| 2F           | TTCGTTGATTTTCCATTAGTTG     | Detecting SCC excision |
| 3R           | TGTAGATTTTGGCTTATTCACCTC   | Detecting SCC excision |
| 3F           | TCGTTATCGCCATTTTAGTTGTAGC  | Detecting SCC excision |

Table S2 Predicted ORFs in the SCC elements of *S. haemolyticus* NW19A

| Locus  | Position    | Genes           | Description                                                | Comments* |
|--------|-------------|-----------------|------------------------------------------------------------|-----------|
| orf 1  | 101-580     | <i>orfX</i>     | rRNA large subunit methyltransferase                       | orfX      |
| orf 2  | 826-1131    |                 | hypothetical protein                                       |           |
| orf 3  | 1330-2193   |                 | hypothetical protein                                       |           |
| orf 4  | 2277-3776   |                 | hypothetical protein                                       |           |
| orf 5  | 4002-5102   |                 | putative DNA polymorease                                   |           |
| orf 6  | 5095-5466   |                 | hypothetical protein                                       |           |
| orf 7  | 5463-7106   |                 | primase                                                    |           |
| orf 8  | 7332-9008   | <i>ccrCI</i>    | cassette chromosome recombinase C1                         | RR        |
| orf 9  | 9114-9452   |                 | hypothetical protein                                       |           |
| orf 10 | 9548-9859   |                 | hypothetical protein                                       |           |
| orf 11 | 9875-10381  |                 | hypothetical protein                                       |           |
| orf 12 | 10530-11204 | <i>IS431-1</i>  | transposase                                                | IS        |
| orf 13 | 11462-11629 | <i>ΔmvaS</i>    | truncated HMG-CoA synthase                                 |           |
| orf 14 | 12546-13289 | <i>ugpQ</i>     | glycerophosphoryl diester phosphodiesterase                |           |
| orf 15 | 13386-13814 | <i>maoC</i>     | acyl dehydratase                                           |           |
| orf 16 | 13860-15869 | <i>mecA</i>     | penicillin-binding protein 2                               | AR        |
| orf 17 | 15984-16076 | <i>ΔmecR1</i>   | truncated mecR1                                            |           |
| orf 18 | 16114-16788 | <i>ΔIS431-2</i> | truncated transposase                                      | IS        |
| orf 19 | 16848-17276 | <i>phnB</i>     | 3-demethylubiquinone-9 3-methyltransferase                 |           |
| orf 20 | 17588-18286 |                 | putative transcriptional regulator                         |           |
| orf 21 | 18448-20436 |                 | hypothetical protein                                       |           |
| orf 22 | 20631-21740 |                 | putative DNA polymorease                                   |           |
| orf 23 | 21733-22101 |                 | hypothetical protein                                       |           |
| orf 24 | 22101-23717 |                 | primase                                                    |           |
| orf 25 | 23942-25621 | <i>ccrCI</i>    | cassette chromosome recombinase C1                         | RR        |
| orf 26 | 25674-26048 |                 | hypothetical protein                                       |           |
| orf 27 | 26127-26441 |                 | hypothetical protein                                       |           |
| orf 28 | 26482-27156 | <i>IS431-3</i>  | transposase                                                | IS        |
| orf 29 | 27353-28732 | <i>tetK</i>     | tetracycline resistance protein                            | AR        |
| orf 30 | 28918-30159 | <i>pre</i>      | plasmid recombination enzyme                               | RR        |
| orf 31 | 30786-31640 | <i>ΔrepC</i>    | truncated replication initiation protein                   |           |
| orf 32 | 31728-32402 | <i>IS431-4</i>  | transposase                                                | IS        |
| orf 33 | 32461-33075 |                 | putative topoisomerase III                                 | RR        |
| orf 34 | 33352-33933 |                 | cassette chromosome helicase                               | RR        |
| orf 35 | 34053-34328 | <i>ΔccrA</i>    | truncated cassette chromosome recombinase A                | RR        |
| orf 36 | 34440-34799 |                 | putative zinc/iron permease                                | HMR       |
| orf 37 | 35006-35332 | <i>yoza</i>     | ArsR family transcriptional regulator                      | HMR       |
| orf 38 | 35653-37587 | <i>czrC</i>     | cadmium and zinc resistance protein C                      | HMR       |
| orf 39 | 38733-40061 |                 | metallo-beta-lactamase family protein                      | AR        |
| orf 40 | 40080-41147 |                 | dihydroneopterin aldolase                                  |           |
| orf 41 | 41543-42301 |                 | putative membrane protein                                  |           |
| orf 42 | 42698-43243 | <i>ydhK</i>     | putative lipoprotein                                       |           |
| orf 43 | 43524-45314 |                 | hypothetical protein                                       |           |
| orf 44 | 44889-45314 |                 | hypothetical protein                                       |           |
| orf 45 | 45355-46053 |                 | hypothetical protein                                       |           |
| orf 46 | 46037-47209 | <i>IS256</i>    | transposase                                                | IS        |
| orf 47 | 47272-47844 |                 | hypothetical protein                                       |           |
| orf 48 | 48120-48896 |                 | putative HNH endonuclease                                  |           |
| orf 49 | 49075-50694 | <i>ΔIS1272</i>  | truncated transposase                                      | IS        |
| orf 50 | 51758-52192 |                 | acetyltransferase                                          |           |
| orf 51 | 52688-53035 |                 | merR family transcriptional regulator                      | HMR       |
| orf 52 | 53113-53796 |                 | ThiJ/Pfpl family protein                                   |           |
| orf 53 | 53818-54483 |                 | putative oxidoreductase                                    |           |
| orf 54 | 54487-55491 | <i>yfmJ</i>     | alcohol dehydrogenase                                      |           |
| orf 55 | 55500-55865 |                 | putative membrane protein                                  |           |
| orf 56 | 56403-57020 | <i>cadD</i>     | cadmium resistance transporter family protein              | HMR       |
| orf 57 | 57039-57380 | <i>cadX</i>     | cadmium resistance transcriptional regulatory protein CadX | HMR       |
| orf 58 | 57400-57801 | <i>arsC</i>     | thioredoxin-coupled arsenate reductase                     | HMR       |
| orf 59 | 57819-59108 | <i>arsB</i>     | arsenical pump membrane protein                            | HMR       |
| orf 60 | 59108-59425 | <i>arsR</i>     | arsenical resistance operon repressor                      | HMR       |
| orf 61 | 59678-61741 | <i>copB</i>     | copper-transporting P-type ATPase B                        | HMR       |
| orf 62 | 61756-63189 | <i>cueO</i>     | multicopper oxidase                                        | HMR       |
| orf 63 | 63209-63691 | <i>ydhK</i>     | putative lipoprotein                                       |           |
| orf 64 | 63897-64292 | <i>arsC</i>     | arsenate reductase                                         | HMR       |

|        |             |             |                                                    |     |
|--------|-------------|-------------|----------------------------------------------------|-----|
| orf 65 | 64311-65603 | <i>arsB</i> | arsenical pump membrane protein                    | HMR |
| orf 66 | 65603-65917 | <i>arsR</i> | arsenic resistance operon repressor                | HMR |
| orf 67 | 66057-67787 | <i>arsA</i> | arsenite-activated ATPase                          | HMR |
| orf 68 | 67768-68115 | <i>arsD</i> | arsenical resistance operon trans-acting repressor | HMR |
| orf 69 | 68397-68591 | <i>yedL</i> | putative N-acetyltransferase                       |     |
| orf 70 | 68637-68957 |             | ArsR family transcriptional regulator              | HMR |
| orf 71 | 69045-69929 |             | Permease                                           |     |
| orf 72 | 69943-70071 |             | hypothetical protein                               |     |
| orf 73 | 70394-71380 |             | ADP-ribosylglycohydrolase                          |     |

---

\*HMR represents heavy metal resistance associated genes. AR represents antibiotic resistance genes. IS represents

Insertion Sequences. RR represents recombination related genes.

Table S3 Presence of defensive systems and origin of strains investigated in this study

| Strain name      | Origin                     | Defensive system*             | Accession no. |
|------------------|----------------------------|-------------------------------|---------------|
| NW19A            | <i>S. haemolyticus</i>     | No                            | KM369884      |
| P126             | <i>S. aureus</i>           | No                            | KF593809      |
| JCSC6994         | <i>S. aureus</i>           | No                            | AB505629      |
| CR01             | <i>S. capitis</i>          | Cas system                    | KF049201      |
| S0385            | <i>S. aureus</i>           | Type I R-M system             | AM990992      |
| JCSC1435         | <i>S. haemolyticus</i>     | Type I R-M system             | AP006716      |
| 06-3288          | <i>S. pseudintermedius</i> | No                            | FJ544922      |
| P211             | <i>S. aureus</i>           | No                            | KF593810      |
| JCSC5952         | <i>S. aureus</i>           | Type I R-M system             | AB478780      |
| JCSC4610         | <i>S. aureus</i>           | No                            | AB773816      |
| WAMRSA40         | <i>S. aureus</i>           | Type I R-M system             | JQ746621      |
| JCSC6943         | <i>S. aureus</i>           | No                            | AB505628      |
| 08BA02176        | <i>S. aureus</i>           | Type I R-M system; Cas system | CP003808      |
| SR 141           | <i>S. aureus</i>           | Type I R-M system             | AB665980      |
| ZH47             | <i>S. aureus</i>           | Type I R-M system             | AM292304      |
| JCSC3624(WIS)    | <i>S. aureus</i>           | Type I R-M system             | AB121219      |
| UMCG-M4          | <i>S. aureus</i>           | Type I R-M system             | GQ902038      |
| PM1              | <i>S. aureus</i>           | Type I R-M system             | AB462393      |
| TSGH17(JCSC7190) | <i>S. aureus</i>           | Type I R-M system             | AB512767      |
| M013             | <i>S. aureus</i>           | Type I R-M system             | CP003166      |
| SA957            | <i>S. aureus</i>           | Type I R-M system             | CP003603      |
| JCSC7481         | <i>S. aureus</i>           | Type I R-M system             | AB774378      |
| GR1              | <i>S. aureus</i>           | Type I R-M system             | AB781448      |
| 3957             | <i>S. aureus</i>           | Type I R-M system             | AB781446      |
| 120              | <i>S. aureus</i>           | Type I R-M system             | AB781444      |
| JCSC6838         | <i>S. aureus</i>           | Type I R-M system             | AB774373      |
| 118              | <i>S. aureus</i>           | Type I R-M system             | AB777516      |
| 3989             | <i>S. aureus</i>           | Type I R-M system             | AB781447      |
| LVP2             | <i>S. aureus</i>           | Type I R-M system             | AB781449      |
| 333              | <i>S. aureus</i>           | Type I R-M system             | AB781445      |
| CMFT1723         | <i>S. aureus</i>           | Type I R-M system             | HF569096      |
| CMFT3119         | <i>S. aureus</i>           | No                            | HF569105      |
| SH621            | <i>S. haemolyticus</i>     | No                            | AB478934      |
| JCSC6082         | <i>S. aureus</i>           | Type I R-M system             | AB373032      |
| 85/2082          | <i>S. aureus</i>           | No                            | AB037671      |
| T0131            | <i>S. aureus</i>           | Type I R-M system             | CP002643      |
| BK16691          | <i>S. aureus</i>           | Type I R-M system             | GU235985      |
| 16K              | <i>S. aureus</i>           | Type I R-M system             | AB666466      |
| HU25             | <i>S. aureus</i>           | No                            | AF422696      |
| Z172             | <i>S. aureus</i>           | Type I R-M system             | CP006838      |
| Bmb9393          | <i>S. aureus</i>           | Type I R-M system             | CP005288      |
| TW20             | <i>S. aureus</i>           | Type I R-M system             | FN433596      |
| XN108            | <i>S. aureus</i>           | Type I R-M system             | CP007447      |
| 85/3907          | <i>S. aureus</i>           | No                            | AB047089      |
| SH32             | <i>S. haemolyticus</i>     | Type III R-M system           | KF006347      |
| WCH1             | <i>S. haemolyticus</i>     | No                            | JQ764731      |
| SH480            | <i>S. haemolyticus</i>     | No                            | AB477967      |
| VH60             | <i>S. aureus</i>           | Type I R-M system             | AB781450      |
| ATCC 12228       | <i>S. epidermidis</i>      | Type I R-M system             | AE015929      |
| RP62A            | <i>S. epidermidis</i>      | Type I R-M system             | CP000029      |
| JCSC6945         | <i>S. aureus</i>           | Type I R-M system             | AB505630      |

\* R-M system is the abbreviation of the Restriction-Modification system.

Table S4 Comparative analysis of SCCs in NW19A with other related-bacteria

| Genus* | Bacteria name | Fragments*** |                                                  |           |       |       |                                      |                   |                   |       |       |  |
|--------|---------------|--------------|--------------------------------------------------|-----------|-------|-------|--------------------------------------|-------------------|-------------------|-------|-------|--|
|        |               | 1            | 2-11                                             | 12-18     | 19-27 | 28-31 | 32-47                                | 48-50             | 51-72             | 73-75 | 76-79 |  |
| SH     | NW19A         | 1            | 2-11                                             | 12-18     | 19-27 | 28-31 | 32-47                                | 48-50             | 51-72             | 73-75 | 76-79 |  |
| SA     | P126 **       | 1            | 2-27(gain a gene behind orf27)(C2Δ)              |           |       |       | 28-47(lost orf46)                    |                   |                   |       |       |  |
| SA     | P211          | 1            | 2-27(gain a gene behind orf27, but lost orf8-24) |           |       |       | 28-47(lost orf46)                    |                   |                   |       |       |  |
| SA     | S0385         | 1            | 2-27(C2Δ)                                        |           |       |       | 32-47(orf46 was replaced by 17 ORFs) |                   |                   |       |       |  |
| SC     | CR01          | 1            | 2-27(C2Δ)                                        |           |       |       |                                      |                   | 51-63(lost orf62) |       |       |  |
| SP     | 06-3228       | 1            | 2-27(C2Δ)                                        |           |       |       |                                      |                   |                   |       |       |  |
| SA     | UMCG-M4       | 1            | 2-27(lost orf13) (C2Δ)                           |           |       |       |                                      |                   |                   |       |       |  |
| SA     | JCSC5952 **   | 1            | 2-27(gain ISSag7 in orf21) (C2Δ)                 |           |       |       |                                      |                   |                   |       |       |  |
| SA     | JCSC4610      | 1            | 2-21(gain ISSag7 in orf21) (C2Δ)                 |           |       |       |                                      |                   |                   |       |       |  |
| SA     | SR141         | 1            | 2-18(C2Δ)                                        |           |       |       |                                      |                   |                   |       |       |  |
| SA     | 08BA02176 **  | 1            | 12-27(C2Δ)                                       |           |       |       |                                      |                   |                   |       | 73-75 |  |
| SA     | GR1 **        | 1            | 2-11                                             | 12-18(C2) | 19-27 |       |                                      |                   |                   |       |       |  |
| SA     | JCSC7481 **   | 1            |                                                  | 12-18(C2) | 19-27 |       |                                      |                   |                   |       |       |  |
| SA     | JCSC6838      | 1            |                                                  |           | 19-27 |       |                                      |                   |                   |       |       |  |
| SA     | JCSC6082      | 1            | 2-11                                             | 12-18(C2) |       |       |                                      |                   |                   |       |       |  |
| SA     | JCSC6943      | 1            |                                                  | 12-18(C2) |       |       |                                      |                   | 51-72             |       |       |  |
| SH     | JCSC1435      | 1            |                                                  | 12-18(C2) | 19-27 |       |                                      |                   | 51-72             |       | 76-79 |  |
| SH     | SH32          | 1            |                                                  | C1        |       | 34-38 |                                      | 51-60             | 61-72             | 73-75 |       |  |
| SH     | WCH1          | 1            |                                                  | C1        |       |       |                                      | 51-60             | 61-63             | 73-75 |       |  |
| SH     | SH621         | 1            |                                                  | ND        |       | 34-38 |                                      | 51-63(lost orf62) |                   |       | 76-79 |  |
| SA     | JCSC6945      | 1            |                                                  | C1        |       |       |                                      | 51-57             | 58-63             |       |       |  |
| SH     | NCTC11042     | 1            |                                                  |           |       |       |                                      |                   | 58-63             |       |       |  |
| SE     | ATCC12228     | 1            |                                                  |           |       |       | 39-41                                |                   | 61-63             | 64-72 |       |  |
| SE     | RP62A         | 1            |                                                  | A         |       |       | 39-41                                |                   | 61                | 64-72 |       |  |
| SH     | SH480         | 1            |                                                  | 12-18(C2) |       |       |                                      |                   |                   | 65-72 |       |  |
| SA     | ZH47          | 1            | 2-17(B2)                                         |           |       |       |                                      |                   |                   |       |       |  |
| SA     | Z172 **       | 1            | 2-11                                             | A         |       | 28-31 |                                      |                   |                   |       |       |  |
| SA     | T0131 **      | 1            | 2-11                                             | A         |       |       |                                      |                   |                   |       |       |  |
| SA     | CMFT3119      | 1            | 2-11                                             | B         |       |       |                                      |                   |                   |       |       |  |
| SA     | BK16691 **    | 1            | 2-11                                             |           |       |       |                                      |                   |                   |       |       |  |

\* The abbreviation of *Staphylococcus* genus. SH, SA, SC, SP and SE represent *S. haemolyticus*, *S. aureus*, *S. capitis*, *S. pseudintermedius* and *S. epidermidis*, respectively.

\*\* These strains contain same fragments as other strains not listed in this table. P126=JCSC6944; JCSC5952=WAMRSA40=PM1=JCSC7190=M013=SA957; 08BA02176=CMFT1723; GR1=3957; JCSC7481=120=118=3989=LVP2=333; Z172=85/2082=TW20; T0131=Bmb9393=XN108=85/3907; BK16691=16K=HU25.

\*\*\* The fragment regions displayed by ORFs. The letters A, B, B2, C1, C2, C2Δ represent different *mec* gene complexes; C2Δ represents class C2 *mec* gene complex with truncated IS431-2. ND: Not-Determined.
